# Supplementary material
Source: PubMed Central journal article supplement (PMC5975256)
Supplement: NIHMS966418-supplement-supporting.pdf [file NIHMS966418-supplement-supporting.pdf]

**Supporting Information**

**For**

**Determination of the Cu(III)-OH Bond Distance by Resonance Raman Spectroscopy using  
a Normalized Version of Badger's Rule**

Andrew D. Spaeth, Nicole L. Gagnon, Debanjan Dhar, Gereon M. Yee, William B. Tolman\*

*Department of Chemistry and Center for Metals in Biocatalysis, University of Minnesota, 207  
Pleasant St. SE, Minneapolis, Minnesota 55455*

\* To whom correspondence should be addressed. E-mail: wtolman@umn.edu

**Cross Validation.** A 5-fold cross validation method was used to ensure the predictive power of the Badger's fit in Figure 3c.<sup>1</sup> All the data (bond length and normalized frequency,  $\nu_{\mu}$ ) from Tables S3-S7 was collected into one master table. The data was randomly sorted into 5 equal groups. One group was selected as the 'test set' while the remaining four groups were used as the 'training set' where this data was fit using the Badger's rule equation (eq. 4). The obtained fitting equation was used to predict the bond length of the 'test set' data. This process was repeated so that each of the five groups became the 'test set'. Of the five 'training sets', the average value of  $C_{ij}$  was  $182.3 \pm 0.5$ , while  $d_{ij}$  was  $0.257 \pm 0.002$ . The root mean squared error (RMSE) was calculated for all data when it was designated the 'test set'. The obtained RMSE was  $0.03 \text{ \AA}$ , which is the exact same value as calculated for the fitting of the entire data set, indicating that this correlation has excellent predictive power.

### Bond Valence Sum Analysis

$$\text{Bond Valence} = e^{((R_0 - R)/B)} \quad (\text{S1})$$

Bond Valence Sum (BVS) equation used in Table 3, where R is the bond distance and  $R_0$  and B are parameters specific to the bond of interest. The calculated bond valences are summed together to determine oxidation state of the metal center.<sup>2</sup>

**Table S1.** Calculated reduced masses used in this work (from unitless relative atomic masses).

| Atomic Pair | Reduced Mass ( $\mu$ ) |
|-------------|------------------------|
| N-N         | 7.0                    |
| O-O         | 8.0                    |
| S-S         | 16.0                   |
| Cr-O        | 12.2                   |
| Mn-O        | 12.4                   |
| Mn-N        | 11.2                   |
| Fe-O        | 12.4                   |
| Fe-N        | 11.2                   |
| Cu-O        | 12.8                   |

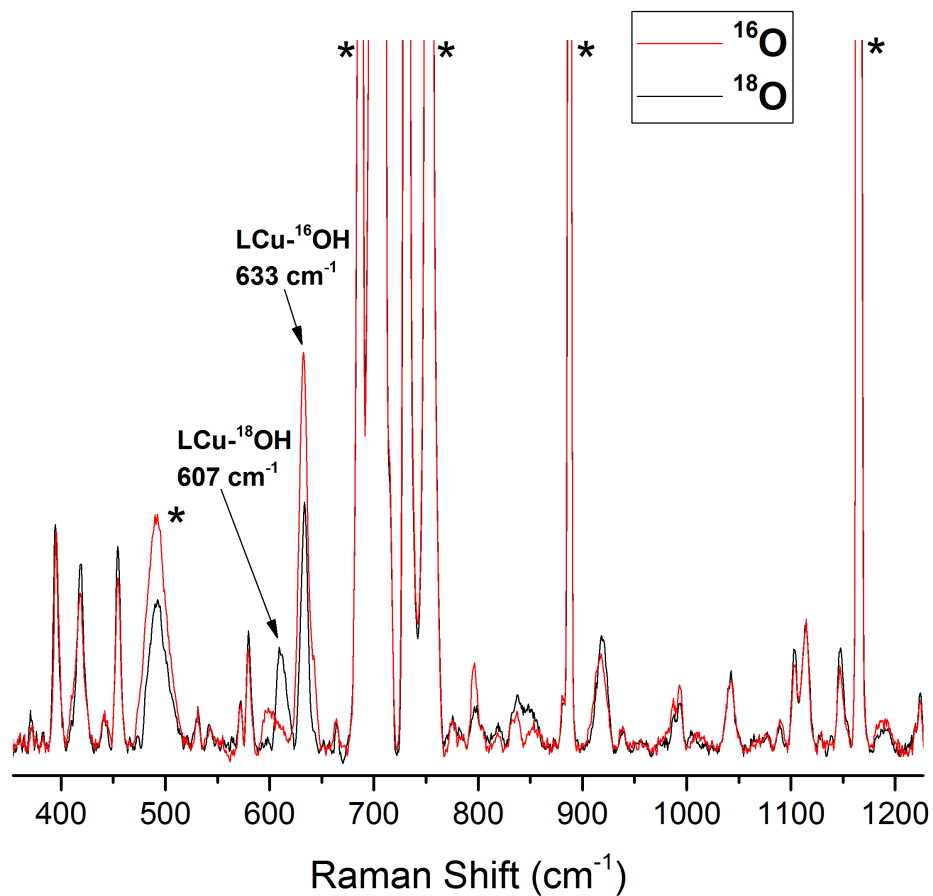

**Figure S1.** Frozen solution rR spectrum of  $1(^{16}\text{O})$  (red) and  $1(^{18}\text{O})$  (black) in  $\text{CH}_2\text{Cl}_2$  at 77 K using 515 nm excitation. Asterisk indicates solvent peak.

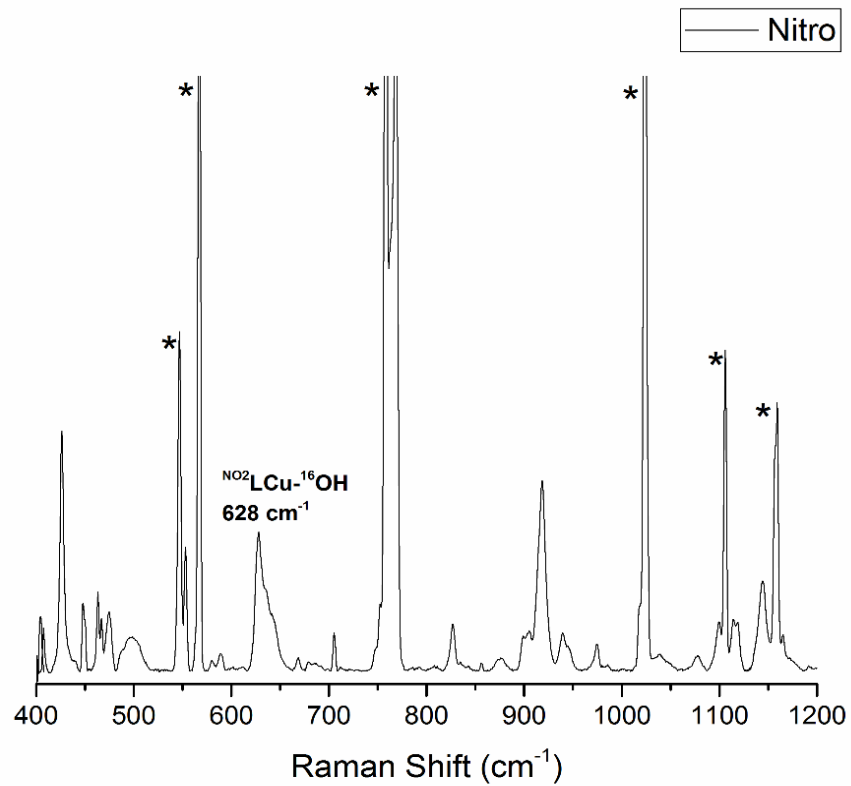

**Figure S2.** Frozen solution rR spectrum of **2** (black) in DFB at 77 K using 514.5 nm excitation. Asterisk indicates solvent peak.

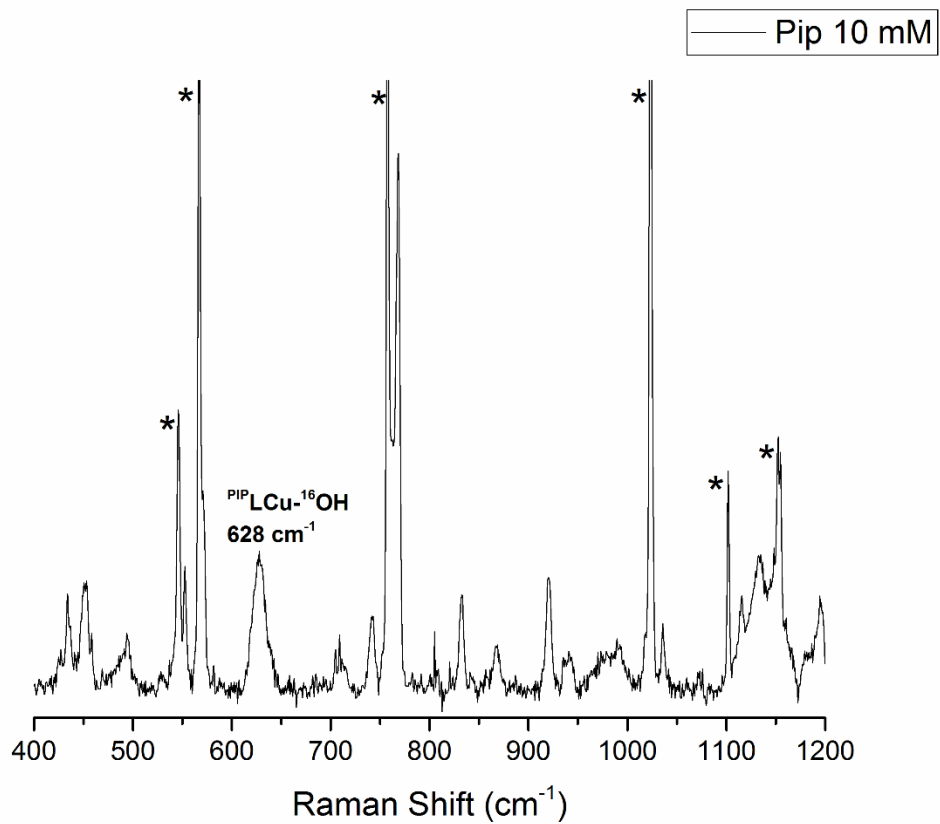

**Figure S3.** Frozen solution rR spectrum of **3** (black) in DFB at 77 K using 514.5 nm excitation. Asterisk indicates solvent peak.

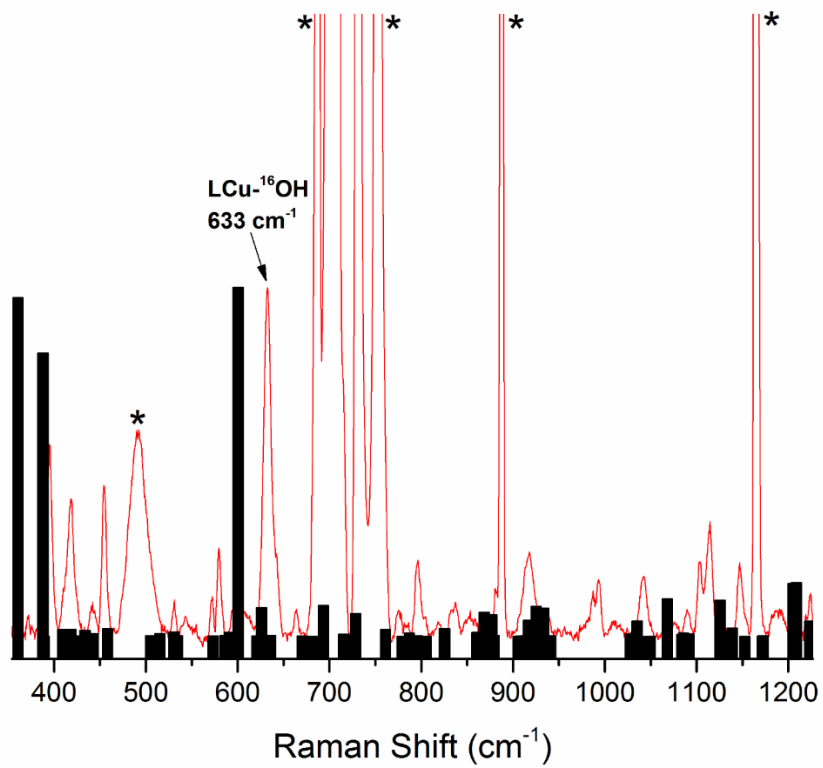

**Figure S4.** Frozen solution rR spectrum of **1** (red line) in DFB at 77 K using 515 nm excitation. Asterisk indicates solvent peak. DFT predicted rR spectrum (black bars), normalized to the 633  $\text{cm}^{-1}$  peak (*mPWPW/TZVP*).

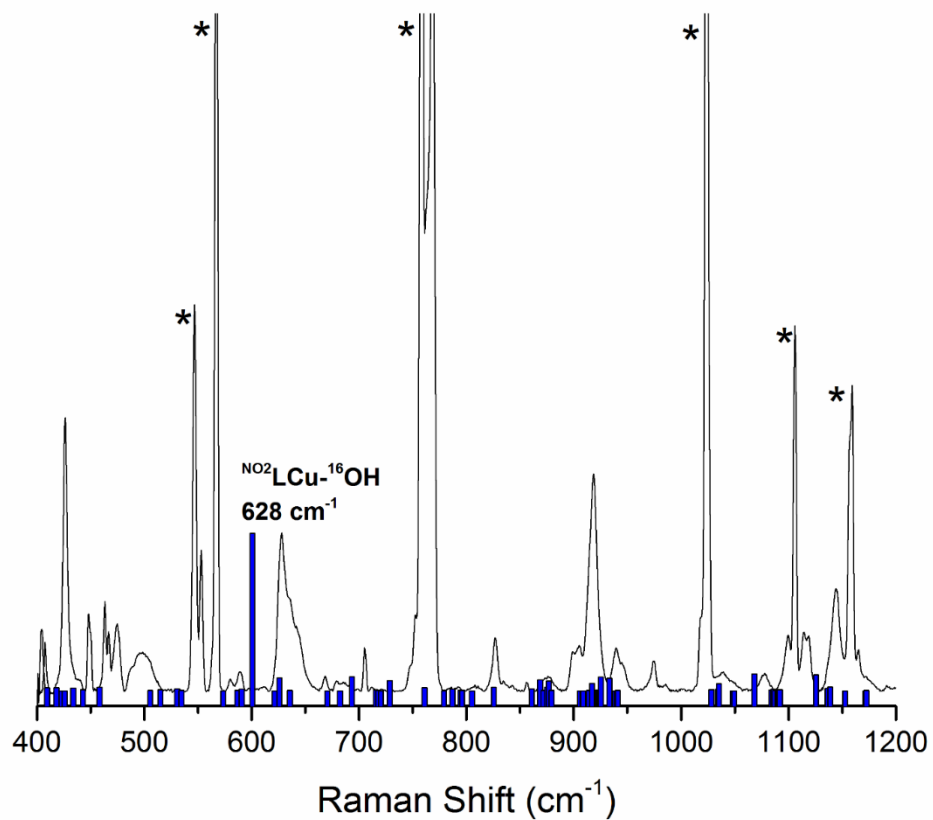

**Figure S5.** Frozen solution rR spectrum of **2** (black line) in DFB at 77 K using 514.5 nm excitation. Asterisk indicates solvent peak. DFT predicted rR spectrum (blue bars), normalized to the 628 cm<sup>-1</sup> peak (*mPWPW/TZVP*).

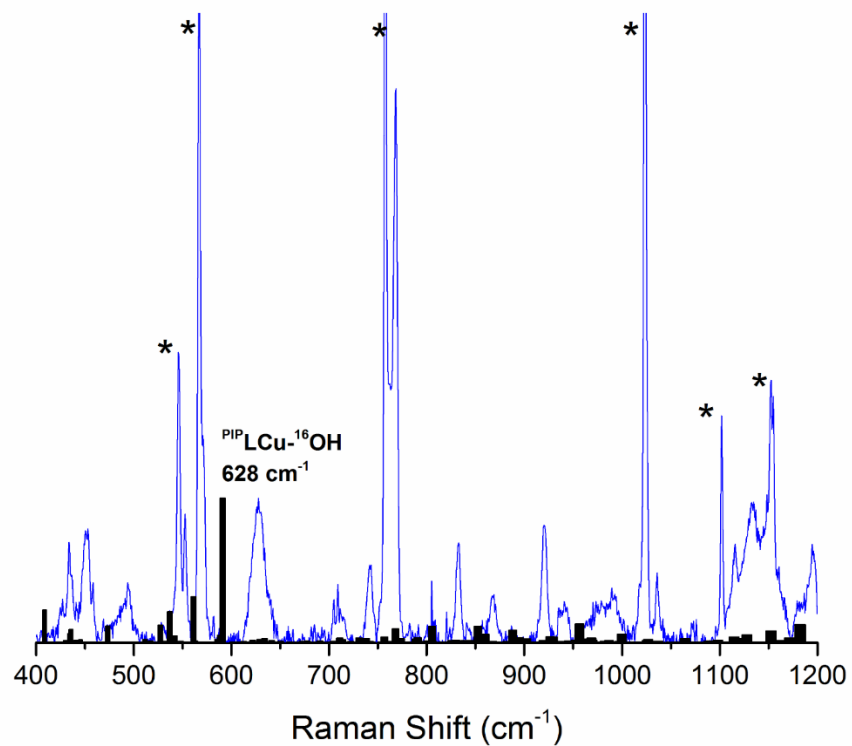

**Figure S6.** Frozen solution rR spectrum of **3** (blue line) in DFB at 77 K using 514.5 nm excitation. Asterisk indicates solvent peak. DFT predicted rR spectrum (black bars), normalized to the 628  $\text{cm}^{-1}$  peak (*mPWPW/TZVP*).



**Table S2.** Structures mined from the Cambridge Structural Database (CSD)<sup>3</sup>, and DFT calculated values using *mPWPW/TZVP* used to construct Figure 3.

| Structure                                                                           | CSD RefCode           | XRD Cu-O (Å) | DFT Calc. Cu-O (Å) | DFT Calc. $\nu_{\text{Cu-O}}$ ( $\text{cm}^{-1}$ ) | Normalized Frequency, $\nu_{\mu}$ ( $\text{cm}^{-1}$ ) |
|-------------------------------------------------------------------------------------|-----------------------|--------------|--------------------|----------------------------------------------------|--------------------------------------------------------|
| 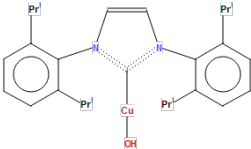   | AKONAQ <sup>4</sup>   | 1.804(2)     | 1.805              | 605                                                | 47                                                     |
|    | GOWCUQ <sup>5</sup>   | 1.849(5)     | 1.925              | 481                                                | 38                                                     |
|   | LEFXOJ <sup>6</sup>   | 1.875(2)     | 1.878              | 514                                                | 40                                                     |
|  | PUXWAG <sup>7</sup>   | 1.895(4)     | 1.949              | 446                                                | 35                                                     |
|  | UKARON <sup>8</sup>   | 1.887(1)     | 1.943              | 456                                                | 36                                                     |
|  | YETNIU02 <sup>9</sup> | 1.878(2)     | 1.924              | 457                                                | 36                                                     |

**Table S3.** DFT Calculated values using *mPWPW/TZVP* used to construct Figure 3.

| Structure                                                                                                     | DFT Calc. Cu-O<br>(Å) | DFT Calc. $\nu_{\text{Cu-O}}$<br>( $\text{cm}^{-1}$ ) | Normalized<br>Frequency, $\nu_{\mu}$<br>( $\text{cm}^{-1}$ ) |
|---------------------------------------------------------------------------------------------------------------|-----------------------|-------------------------------------------------------|--------------------------------------------------------------|
| 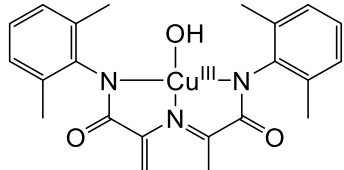<br>MeLCu <sup>III</sup> -OH | 1.816                 | 601                                                   | 47                                                           |
| <br>[1] <sup>-</sup>         | 1.869                 | 516                                                   | 40                                                           |
| <br>3                       | 1.795                 | 591                                                   | 46                                                           |
| <br>1                      | 1.815                 | 599                                                   | 47                                                           |
| <br>2                      | 1.813                 | 598                                                   | 47                                                           |

**Table S4.** Bond distances and frequencies from DFT geometry optimized structures for Fe-O(H) (B3LYP/6-311G) and O-O (*mPWPW91/DVZP-TZVP*) used to construct Figure 3.

| Bond Type | Core                        | DFT Calc. Distance (Å) | DFT Calc. $\nu$ ( $\text{cm}^{-1}$ ) | Normalized Frequency, $\nu_{\mu}$ ( $\text{cm}^{-1}$ ) | Ref |
|-----------|-----------------------------|------------------------|--------------------------------------|--------------------------------------------------------|-----|
| Fe-O(H)   | Fe-O                        | 1.627                  | 852                                  | 69                                                     | 10  |
|           | Fe-O                        | 1.634                  | 836                                  | 67                                                     |     |
|           | Fe-O                        | 1.648                  | 804                                  | 65                                                     |     |
|           | Fe-O                        | 1.648                  | 793                                  | 64                                                     |     |
|           | Fe-O                        | 1.652                  | 792                                  | 64                                                     |     |
|           | Fe-O                        | 1.652                  | 785                                  | 63                                                     |     |
|           | Fe-O                        | 1.669                  | 754                                  | 61                                                     |     |
|           | Fe-OH                       | 1.762                  | 616                                  | 50                                                     |     |
|           | Fe-OH                       | 1.779                  | 601                                  | 48                                                     |     |
|           | Fe-OH                       | 1.812                  | 594                                  | 48                                                     |     |
|           | Fe-OH                       | 1.814                  | 588                                  | 47                                                     |     |
|           | Fe-OH                       | 1.813                  | 565                                  | 45                                                     |     |
|           | Fe-OH                       | 1.850                  | 546                                  | 44                                                     |     |
|           | Fe-OH                       | 1.852                  | 536                                  | 43                                                     |     |
|           | Fe-OH                       | 1.893                  | 494                                  | 40                                                     |     |
|           | Fe-OH                       | 1.905                  | 488                                  | 39                                                     |     |
|           | Fe-OH                       | 1.920                  | 462                                  | 37                                                     |     |
|           | Fe-O                        | 1.671                  | 783                                  | 63                                                     |     |
|           | Fe-O                        | 1.652                  | 792                                  | 64                                                     |     |
|           | Fe-O                        | 1.680                  | 749                                  | 60                                                     |     |
|           | Fe-O                        | 1.817                  | 589                                  | 47                                                     |     |
|           | Fe-O                        | 1.806                  | 610                                  | 49                                                     |     |
|           | Fe-O                        | 1.650                  | 819                                  | 66                                                     |     |
|           | Fe-O                        | 1.770                  | 666                                  | 54                                                     |     |
|           | Fe-OH                       | 1.891                  | 497                                  | 40                                                     |     |
|           | Fe-OH                       | 1.869                  | 526                                  | 42                                                     |     |
|           | Fe-OH                       | 1.884                  | 486                                  | 39                                                     |     |
|           | Fe-OH                       | 1.925                  | 450                                  | 36                                                     |     |
|           | Fe-OH                       | 1.913                  | 477                                  | 38                                                     |     |
|           | Fe-OH                       | 1.936                  | 462                                  | 37                                                     |     |
|           | Fe-OH                       | 1.768                  | 657                                  | 53                                                     |     |
|           | Fe-OH                       | 1.838                  | 579                                  | 47                                                     |     |
| O-O       | O <sub>2</sub> <sup>+</sup> | 1.122                  | 1946                                 | 243                                                    | 11  |
|           | O <sub>2</sub> (T)          | 1.220                  | 1550                                 | 194                                                    |     |
|           | Cu-O <sub>2</sub>           | 1.329                  | 1124                                 | 141                                                    |     |
|           | Cu-O <sub>2</sub>           | 1.322                  | 1111                                 | 139                                                    |     |
|           | Cr-O <sub>2</sub>           | 1.339                  | 1086                                 | 136                                                    |     |
|           | NaO <sub>2</sub>            | 1.369                  | 1087                                 | 136                                                    |     |
|           | Co-O <sub>2</sub>           | 1.380                  | 987                                  | 123                                                    |     |

|                               |       |      |     |
|-------------------------------|-------|------|-----|
| Cr-O <sub>2</sub>             | 1.361 | 1034 | 129 |
| O <sub>2</sub> <sup>-</sup>   | 1.363 | 1097 | 137 |
| LiO <sub>2</sub>              | 1.364 | 1097 | 137 |
| Mn-O <sub>2</sub>             | 1.377 | 1009 | 126 |
| NiO <sub>2</sub>              | 1.382 | 982  | 123 |
| Cu-O <sub>2</sub>             | 1.376 | 1013 | 127 |
| Cu-O <sub>2</sub>             | 1.358 | 1041 | 130 |
| Pd-O <sub>2</sub>             | 1.400 | 941  | 118 |
| Mn-O <sub>2</sub>             | 1.430 | 937  | 117 |
| H <sub>2</sub> O <sub>2</sub> | 1.471 | 892  | 112 |
| Al-O <sub>2</sub>             | 1.691 | 543  | 68  |

---

**Table S5.** Bond distances from EXAFS/XRD and experimental frequencies for the data set used to construct Figure 3.

| Bond type | Core                                                  | EXAFS/XRD<br>(Å) | Exp. $\nu$<br>( $\text{cm}^{-1}$ ) | Normalized<br>Frequency,<br>$\nu_{\mu}$ ( $\text{cm}^{-1}$ ) | Ref |
|-----------|-------------------------------------------------------|------------------|------------------------------------|--------------------------------------------------------------|-----|
| Cu-O      | Cu-( $\mu$ - $\eta^1$ : $\eta^2$ -O <sub>2</sub> )-Fe | 1.870            | 515                                | 40                                                           | 12  |
|           | Cu <sub>2</sub> -( $\mu$ -O) <sub>2</sub>             | 1.810            | 609                                | 48                                                           | 13  |
|           | Cu-O-O-Cu                                             | 1.852            | 561                                | 44                                                           | 14  |
|           | Cu-OOR                                                | 1.887            | 518                                | 41                                                           | 15  |
|           | Cu <sub>2</sub> -( $\mu$ -O) <sub>2</sub>             | 1.814            | 610                                | 48                                                           | 16  |
|           | Cu <sub>2</sub> -( $\mu$ -O) <sub>2</sub>             | 1.828            | 600                                | 47                                                           | 17  |
|           | Cu <sub>2</sub> -( $\mu$ -O) <sub>2</sub>             | 1.806            | 612                                | 48                                                           | 18  |
|           | Cu-( $\mu$ -O) <sub>2</sub>                           | 1.840            | 554                                | 43                                                           | 19  |
|           | Cu-OOR                                                | 1.810            | 652                                | 51                                                           | 20  |
|           | Cu-OR                                                 | 1.8324           | 592                                | 46                                                           | 21  |
| Mn-O      | Mn-O                                                  | 1.560            | 979                                | 79                                                           | 22  |
|           | Mn-O                                                  | 1.550            | 975                                | 79                                                           | 22  |
|           | Mn-O                                                  | 1.771            | 700                                | 56                                                           | 23  |
|           | Mn-O                                                  | 1.760            | 737                                | 59                                                           | 23  |
|           | Mn-O                                                  | 1.680            | 746                                | 60                                                           | 23  |
|           | Mn-O                                                  | 1.555            | 979                                | 79                                                           | 24  |
| Fe-O      | Fe-O                                                  | 1.813            | 671                                | 54                                                           | 23  |
|           | Fe-O                                                  | 1.680            | 799                                | 64                                                           | 23  |
|           | Fe-O                                                  | 1.640            | 824                                | 66                                                           | 25  |
|           | Fe-O                                                  | 1.640            | 839                                | 67                                                           | 25  |
|           | Fe <sub>2</sub> -( $\mu$ -O) <sub>2</sub>             | 1.79             | 673                                | 54                                                           | 26  |
|           | Fe <sub>2</sub> -( $\mu$ -O) <sub>2</sub>             | 1.78             | 674                                | 54                                                           | 27  |
|           | Fe-O                                                  | 1.667            | 826                                | 66                                                           | 28  |
|           | Fe-O-Fe                                               | 1.77             | 850, 381                           | 49                                                           | 29  |
|           | Fe-O-Fe                                               | 1.76             | 885, 363                           | 50                                                           |     |
|           | Fe-O-Fe                                               | 1.795            | 838, 409                           | 50                                                           |     |
|           | Fe-O-Fe                                               | 1.77             | 860, 403                           | 51                                                           |     |
|           | Fe-O-Fe                                               | 1.76             | 870, 458                           | 53                                                           |     |
|           | Fe-O-Fe                                               | 1.79             | 827, 395                           | 49                                                           |     |
|           | Fe-O-Fe                                               | 1.78             | 795, 425                           | 49                                                           |     |
|           | Fe-O-Fe                                               | 1.765            | 846, 422                           | 51                                                           |     |
|           | Fe-O-Fe                                               | 1.765            | 850, 425                           | 51                                                           |     |
|           | Fe-O-Fe                                               | 1.79             | 763, 494                           | 51                                                           |     |
|           | Fe-O-Fe                                               | 1.79             | 772, 497                           | 51                                                           |     |
|           | Fe-O-Fe                                               | 1.785            | 770, 499                           | 51                                                           |     |
|           | Fe-O-Fe                                               | 1.80             | 778, 454                           | 50                                                           |     |
| Fe-O-Fe   | 1.78                                                  | 749, 540         | 52                                 |                                                              |     |
| Fe-O-Fe   | 1.80                                                  | 745, 537         | 52                                 |                                                              |     |
| Fe-O-Fe   | 1.785                                                 | 727, 537         | 51                                 |                                                              |     |

|      |                                                |       |          |     |                 |
|------|------------------------------------------------|-------|----------|-----|-----------------|
|      | Fe-O-Fe                                        | 1.79  | 725, 525 | 50  |                 |
|      | Fe-O-Fe                                        | 1.785 | 749, 528 | 51  |                 |
|      | Fe-O-Fe                                        | 1.765 | 768, 507 | 51  |                 |
|      | Fe-O-Fe                                        | 1.78  | 756, 493 | 50  |                 |
| Fe-N | Fe-N                                           | 1.53  | 1034     | 92  | 30              |
|      | Fe-N                                           | 1.526 | 1008     | 90  | 31              |
|      | Fe-N-Fe                                        | 1.54  | 918      | 82  | 32              |
| Mn-N | Mn-N                                           | 1.512 | 1050     | 94  | 33              |
| Cr-O | CrO <sub>2</sub> Cl <sub>2</sub>               | 1.580 | 984      | 80  | 34              |
|      | CrO <sub>4</sub> <sup>2-</sup>                 | 1.660 | 847      | 69  |                 |
|      | Cr <sub>2</sub> O <sub>7</sub> <sup>2-</sup>   | 1.630 | 904      | 74  |                 |
|      | Cr <sub>3</sub> O <sub>10</sub> <sup>2-</sup>  | 1.598 | 956      | 78  |                 |
|      | Cr <sub>4</sub> O <sub>13</sub> <sup>2-</sup>  | 1.587 | 963      | 79  |                 |
|      | K <sub>2</sub> CrO <sub>4</sub>                | 1.650 | 874      | 71  |                 |
|      | K <sub>2</sub> Cr <sub>2</sub> O <sub>7</sub>  | 1.630 | 902      | 74  |                 |
|      | K <sub>2</sub> Cr <sub>3</sub> O <sub>10</sub> | 1.593 | 945      | 77  |                 |
|      | K <sub>2</sub> Cr <sub>4</sub> O <sub>10</sub> | 1.587 | 957      | 78  |                 |
|      | CrO <sub>3</sub>                               | 1.578 | 975      | 80  |                 |
| N-N  |                                                | 1.115 | 2109     | 301 | 35 <sup>a</sup> |
|      |                                                | 1.113 | 2031     | 290 |                 |
|      |                                                | 1.07  | 2127     | 304 |                 |
|      |                                                | 1.144 | 2040     | 291 |                 |
|      |                                                | 1.08  | 2116     | 302 |                 |
|      |                                                | 1.09  | 2053     | 293 |                 |
|      |                                                | 1.104 | 2124     | 303 |                 |
|      |                                                | 1.11  | 2038     | 291 |                 |
|      |                                                | 1.106 | 2086     | 298 |                 |
|      |                                                | 1.107 | 2138     | 305 |                 |
|      |                                                | 1.107 | 1979     | 283 |                 |
|      |                                                | 1.105 | 2090     | 298 |                 |
|      |                                                | 1.085 | 2028     | 290 |                 |
|      |                                                | 1.12  | 2004     | 286 |                 |
|      |                                                | 1.119 | 1976     | 282 |                 |
|      |                                                | 1.13  | 2033     | 290 |                 |
|      |                                                | 1.106 | 2041     | 291 |                 |
|      |                                                | 1.107 | 2111     | 301 |                 |
|      |                                                | 1.113 | 2148     | 307 |                 |
|      |                                                | 1.095 | 2153     | 307 |                 |
|      |                                                | 1.112 | 2072     | 296 |                 |
|      |                                                | 1.117 | 1959     | 280 |                 |
|      |                                                | 1.136 | 2043     | 292 |                 |
|      |                                                | 1.054 | 2143     | 306 |                 |
|      |                                                | 1.085 | 1934     | 276 |                 |
|      |                                                | 1.099 | 2142     | 306 |                 |

|     |                             |        |      |     |    |
|-----|-----------------------------|--------|------|-----|----|
|     |                             | 1.12   | 1897 | 271 |    |
|     |                             | 1.087  | 2010 | 287 |    |
|     |                             | 1.102  | 2090 | 298 |    |
|     |                             | 1.065  | 2008 | 287 |    |
|     |                             | 1.123  | 2063 | 295 |    |
|     |                             | 1.094  | 2122 | 303 |    |
|     |                             | 1.18   | 1719 | 245 |    |
|     |                             | 1.167  | 1818 | 260 |    |
|     |                             | 1.237  | 1414 | 202 |    |
|     |                             | 1.239  | 1418 | 202 |    |
|     |                             | 1.096  | 2142 | 306 |    |
|     |                             | 1.235  | 1548 | 221 |    |
|     |                             | 1.144  | 2024 | 289 |    |
|     |                             | 1.246  | 1370 | 196 |    |
|     |                             | 1.286  | 1270 | 181 |    |
|     |                             | 1.208  | 1685 | 241 |    |
|     |                             | 1.166  | 1760 | 251 |    |
|     |                             | 1.2145 | 1630 | 233 |    |
|     |                             | 1.239  | 1503 | 215 |    |
|     |                             | 1.265  | 1349 | 193 |    |
|     |                             | 1.124  | 2005 | 286 |    |
|     |                             | 1.132  | 2007 | 287 |    |
|     |                             | 1.131  | 2042 | 292 |    |
|     |                             | 1.136  | 1939 | 277 |    |
|     |                             | 1.151  | 1770 | 253 |    |
|     |                             | 1.18   | 1810 | 258 |    |
|     |                             | 1.192  | 1778 | 254 |    |
|     |                             | 1.215  | 1625 | 232 |    |
|     |                             | 1.238  | 1583 | 226 |    |
|     |                             | 1.241  | 1589 | 227 |    |
|     |                             | 1.12   | 2164 | 309 |    |
|     |                             | 1.211  | 1598 | 228 |    |
|     |                             | 1.22   | 1599 | 228 |    |
|     |                             | 1.185  | 1696 | 242 |    |
|     |                             | 1.1    | 2359 | 337 |    |
|     |                             | 1.25   | 1556 | 222 |    |
|     |                             | 1.45   | 885  | 126 |    |
| O-O | O <sub>2</sub> <sup>+</sup> | 1.123  | 1858 | 232 | 11 |
|     | O <sub>2</sub> (T)          | 1.208  | 1549 | 194 |    |
|     | O <sub>2</sub> (S)          | 1.216  | 1484 | 186 |    |
|     | Sm-O <sub>2</sub>           | 1.319  | 1124 | 141 |    |
|     | Cr-O <sub>2</sub>           | 1.325  | 1104 | 138 |    |
|     | Cr-O <sub>2</sub>           | 1.327  | 1072 | 134 |    |
|     | NaO <sub>2</sub>            | 1.33   | 1094 | 137 |    |

|     |                                                                |        |      |     |                 |
|-----|----------------------------------------------------------------|--------|------|-----|-----------------|
|     | Co-O <sub>2</sub>                                              | 1.355  | 961  | 120 |                 |
|     | Cu-O <sub>2</sub>                                              | 1.39   | 961  | 120 |                 |
|     | Cu-O <sub>2</sub>                                              | 1.392  | 974  | 122 |                 |
|     | Pd-O <sub>2</sub>                                              | 1.411  | 891  | 111 |                 |
|     | Co-O <sub>2</sub>                                              | 1.429  | 890  | 111 |                 |
|     | Mn-O <sub>2</sub>                                              | 1.43   | 892  | 112 |                 |
|     | H <sub>2</sub> O <sub>2</sub>                                  | 1.453  | 880  | 110 |                 |
|     | Co-O <sub>2</sub>                                              | 1.457  | 861  | 108 |                 |
|     |                                                                | 1.302  | 1123 | 140 | 35 <sup>a</sup> |
|     |                                                                | 1.347  | 971  | 121 |                 |
|     |                                                                | 1.432  | 920  | 115 |                 |
|     |                                                                | 1.438  | 924  | 116 |                 |
|     |                                                                | 1.424  | 910  | 114 |                 |
|     |                                                                | 1.432  | 931  | 116 |                 |
|     |                                                                | 1.436  | 884  | 111 |                 |
|     |                                                                | 1.428  | 892  | 112 |                 |
|     |                                                                | 1.488  | 868  | 109 |                 |
|     |                                                                | 1.438  | 882  | 110 |                 |
|     |                                                                | 1.46   | 890  | 111 |                 |
|     |                                                                | 1.445  | 873  | 109 |                 |
|     |                                                                | 1.461  | 893  | 112 |                 |
|     |                                                                | 1.44   | 968  | 121 |                 |
|     |                                                                | 1.21   | 1580 | 198 |                 |
|     |                                                                | 1.33   | 1098 | 137 |                 |
|     |                                                                | 1.49   | 877  | 110 |                 |
| S-S | Cu <sub>2</sub> -S <sub>2</sub>                                | 2.214  | 442  | 28  | 36              |
|     | Cu <sub>2</sub> -S <sub>2</sub>                                | 2.2007 | 443  | 28  |                 |
|     | Cu <sub>2</sub> -S <sub>2</sub>                                | 2.1265 | 454  | 28  |                 |
|     | Cu <sub>2</sub> -S <sub>2</sub>                                | 2.2138 | 424  | 26  |                 |
|     | Cu <sub>2</sub> -S <sub>2</sub>                                | 2.2007 | 435  | 27  |                 |
|     | Cu <sub>2</sub> -S <sub>2</sub>                                | 2.2013 | 441  | 28  |                 |
|     | Cu <sub>2</sub> -S <sub>2</sub>                                | 2.2060 | 428  | 27  |                 |
|     | Cu <sub>2</sub> -S <sub>2</sub>                                | 2.2130 | 432  | 27  |                 |
|     | Cu <sub>2</sub> -S <sub>2</sub>                                | 2.165  | 440  | 27  |                 |
|     | Cu <sub>2</sub> -S <sub>2</sub>                                | 2.1691 | 443  | 28  |                 |
|     | Cu <sub>2</sub> -S <sub>2</sub>                                | 2.073  | 500  | 31  |                 |
|     | Cu <sub>2</sub> -S <sub>2</sub>                                | 2.044  | 499  | 31  |                 |
|     | Ir <sub>2</sub> -S <sub>2</sub>                                | 1.9500 | 613  | 38  |                 |
|     | Mo-S <sub>2</sub>                                              | 2.07   | 528  | 33  |                 |
|     | Mo-S <sub>2</sub>                                              | 2.01   | 530  | 33  |                 |
|     | Nb-S <sub>2</sub>                                              | 2.02   | 558  | 35  |                 |
|     | Mo <sub>2</sub> -S <sub>2</sub>                                | 2.01   | 540  | 34  |                 |
|     | Mo <sub>2</sub> -S <sub>2</sub> (S <sub>2</sub> ) <sub>2</sub> | 2.08   | 510  | 32  |                 |
|     | Mo <sub>4</sub> -(S <sub>2</sub> ) <sub>5</sub>                | 2.04   | 536  | 33  |                 |



|                                                                |       |     |    |
|----------------------------------------------------------------|-------|-----|----|
| Mo <sub>4</sub> -(S <sub>2</sub> ) <sub>5</sub>                | 2.05  | 550 | 34 |
| Ru <sub>2</sub> -S <sub>2</sub>                                | 2.01  | 514 | 32 |
| Fe <sub>2</sub> -S <sub>2</sub>                                | 2.02  | 507 | 32 |
| Mo <sub>4</sub> -(S <sub>2</sub> ) <sub>6</sub>                | 2.08  | 480 | 30 |
| Fe <sub>4</sub> -S <sub>2</sub> (S <sub>2</sub> ) <sub>2</sub> | 2.04  | 503 | 31 |
| Fe <sub>4</sub> -S <sub>2</sub> (S <sub>2</sub> ) <sub>2</sub> | 2.05  | 478 | 30 |
| Mo <sub>2</sub> -(S <sub>2</sub> ) <sub>6</sub>                | 2.04  | 550 | 34 |
| Mo <sub>2</sub> -(S <sub>2</sub> ) <sub>2</sub>                | 1.98  | 561 | 35 |
| Nb <sub>2</sub> -S <sub>2</sub>                                | 2.03  | 588 | 37 |
| Mo <sub>3</sub> -(S <sub>2</sub> ) <sub>6</sub>                | 2.02  | 545 | 34 |
| Mo <sub>3</sub> -(S <sub>2</sub> ) <sub>3</sub>                | 2.03  | 562 | 35 |
| Fe <sub>2</sub> -S <sub>2</sub>                                | 2.01  | 555 | 35 |
| Mo <sub>2</sub> -S <sub>2</sub>                                | 2.04  | 518 | 32 |
| Mo <sub>2</sub> -S <sub>2</sub>                                | 2.00  | 520 | 32 |
| S <sub>2</sub>                                                 | 1.892 | 718 | 45 |

<sup>a</sup> Cores not identified by reference 35.

**Table S6.** Enzyme intermediates with experimental determination of both bond length and stretching frequency used to construct Figure 3.

| Enzyme<br>(Intermediate) | Core                            | Exp.<br>Bond<br>Length<br>(Å) <sup>a</sup> | Exp. $\nu$<br>(cm <sup>-1</sup> ) | Normalized<br>Frequency,<br>$\nu_{\mu}$ (cm <sup>-1</sup> ) | Ref.   |
|--------------------------|---------------------------------|--------------------------------------------|-----------------------------------|-------------------------------------------------------------|--------|
| <b>HRP-(I)</b>           | Fe-O                            | 1.673                                      | 790                               | 64                                                          | 37, 38 |
| <b>HRP-(II)</b>          | Fe-O                            | 1.704                                      | 789                               | 63                                                          | 38, 39 |
| <b>CPO-(I)</b>           | Fe-O                            | 1.65                                       | 790                               | 64                                                          | 40, 41 |
| <b>CPO-(II)</b>          | Fe-O                            | 1.82                                       | 565                               | 45                                                          | 42, 38 |
| <b>TauD-(J)</b>          | Fe-O                            | 1.62                                       | 821                               | 66                                                          | 43, 44 |
| <b>Mb-(II)</b>           | Fe-O                            | 1.658                                      | 805                               | 65                                                          | 45     |
| <b>sMMO-(Q)</b>          | Fe <sub>2</sub> -O <sub>2</sub> | 1.77                                       | 690                               | 55                                                          | 46, 47 |
| <b>oxyHc</b>             | O-O                             | 1.51                                       | 742                               | 93                                                          | 48, 49 |

(a) Determined by EXAFS/XRD and estimated standard deviations indicated in parentheses. Abbreviations: CPO is chloroperoxidase, HRP is horse-radish peroxidase, Mb is myoglobin, oxyHc is oxyhemocyanin, sMMO is soluble methane monooxygenase, TauD is alpha-ketoglutarate-dependent taurine dioxygenase.

**Note for Figure S7.** The simple correlation we have discovered also seems to break down upon analysis of diatomic molecules in the gas phase (Figure S7). In addition to the well-behaved line already described, four new trend lines (or striations) appear (Figure S7c). Any diatomics featuring –H or –<sup>2</sup>H bonds form striations above the Badger’s rule trend line in Figure

$3c$  ( $\nu_{\mu} < \sim 300 \text{ cm}^{-1}$ ), while many metal-metal diatomics fall below the line ( $\nu_{\mu} > \sim 30 \text{ cm}^{-1}$ ). It is unclear at this time why these significant deviations are observed for these simple diatomic species in the gas phase, however, our Badger's rule correlation still retains predictive power within the limitations we have outlined.

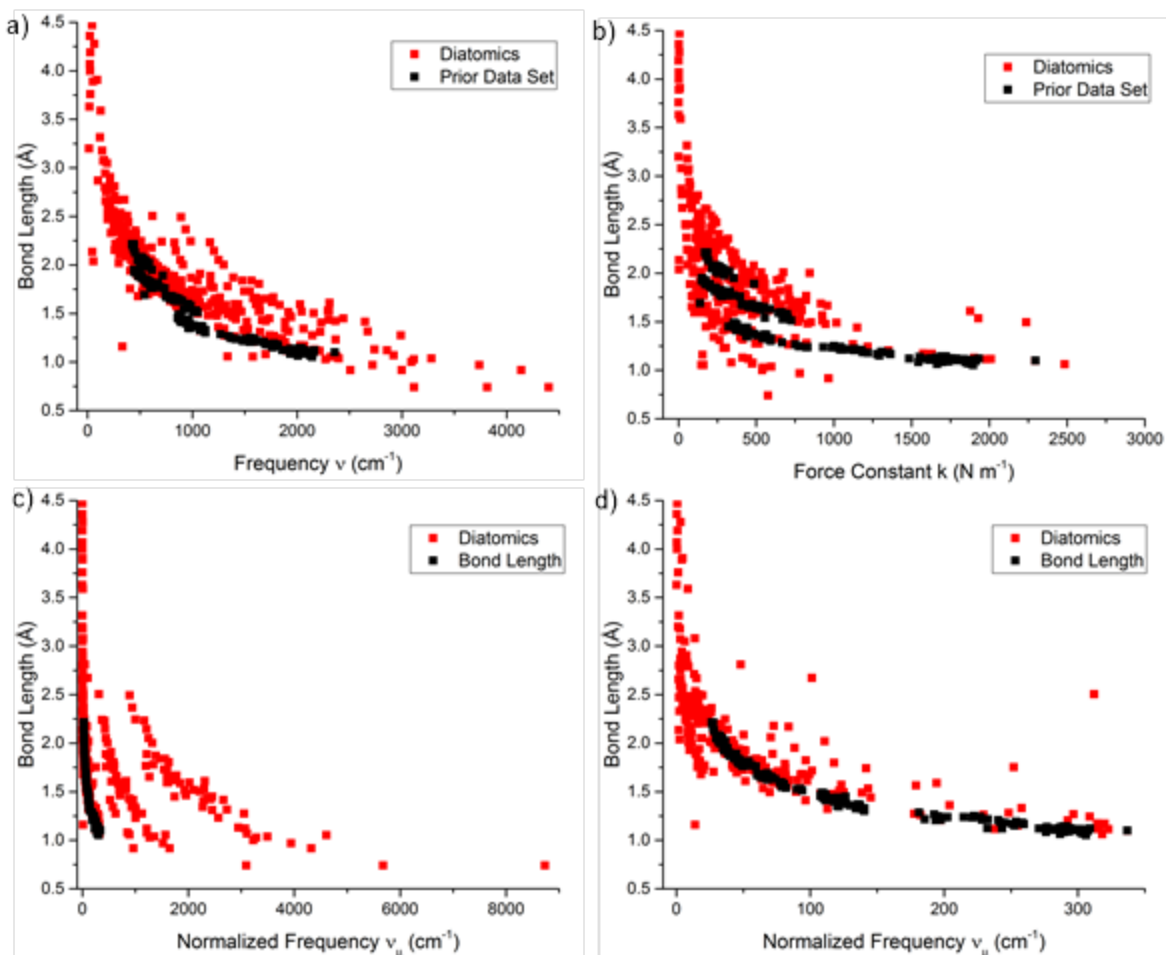

**Figure S7.** Plots featuring diatomic data<sup>50</sup> (red) with the prior data set (from Figure 3. black) with bond length vs. frequency,  $\nu$  (a); force constant,  $k$  (b); and normalized frequency,  $\nu_{\mu}$  (c). Graph (d) is a zoom-in of graph (c).









C -5.85715404265620 0.43096582468041 -1.09953962225564  
H -6.28807080618034 1.39641008721292 -0.79838137645746  
H -6.58014381153136 -0.05590503650131 -1.76798095548170  
H -4.94730097469878 0.62627850391692 -1.68341219669277  
H -4.93325970320164 1.16059785648986 1.43452913027035  
H -4.40905576846449 -0.43846703005509 1.94772508038061  
H -2.54548873128551 -0.39061697965095 0.49180008805515  
C -3.41707900259293 2.80491030808604 0.00827762561700  
C -2.79944374725389 3.95442970667081 -0.43207253571004  
C -1.45284537523516 3.92267937992739 -0.83874767872278  
H -0.94365849893231 4.81597426594982 -1.19389351443956  
H -3.35948382529786 4.88841280306208 -0.46880808344874  
H -4.46156538015036 2.82281981198675 0.30428404550250  
H 0.5999206931660 2.17165003789556 -2.30401067347693  
H 1.14321467022853 3.52197285972043 -1.28940260623070  
H 3.18979537924474 0.55507801386114 -0.33561892219650  
H 3.21496408406991 1.94157893033602 -1.43879442137857  
H 3.28267510073957 -0.26214496821019 -2.65809124689478  
H 1.85942062185782 0.66429064704577 -3.12193642780526  
O -1.17942238839704 -1.45884770768108 0.34597132558953  
H -1.32284563685273 -2.01941875253787 -0.43467897035865

C 3.02283403805223 -1.49875030105749 2.43486788547070  
C 2.87204592590092 -2.87524090200956 2.64245515327836  
C 1.80246487506416 -3.55059965684378 2.08038403825422  
C 0.86860751032794 -2.83189988208370 1.29832964301556  
N 1.03435367114588 -1.49811154689887 1.07452861764209  
N -0.24681859579196 -3.40084252679440 0.71572963994647  
C -0.80302885586051 -4.65510587471956 1.02636910513925  
O -0.28762207806399 -5.41142976586508 1.83742154603307  
C -2.11877989341268 -4.99074145532883 0.28861656159268  
C -1.88356149277223 -4.98773872508587 -1.23707385248110  
H -1.10812760210924 -5.71289790571871 -1.51745904776240  
H -1.58426021160858 -4.00174651749034 -1.61439736494432  
H -2.81215857839421 -5.27643417077309 -1.74806454663315  
C -2.57697548970998 -6.38818604534279 0.73370711143050  
H -1.82699642174847 -7.15017864579794 0.49192020877088  
H -3.51261635767873 -6.64552970936674 0.22010762585852  
H -2.75108917269802 -6.42763788371143 1.81516907404816  
C -3.20174393959449 -3.95515221484703 0.66765541304005  
H -4.15050669980600 -4.22408994809503 0.18425845215138  
H -2.93936798356912 -2.93834522560638 0.34692327552581  
H -3.37118885057036 -3.93808588127230 1.75247981149092  
H -0.70792352628029 -2.79057476812536 0.00734132013905  
H 1.64304192880745 -4.61180837230542 2.23687596887274  
H 3.59328197039590 -3.42121092972221 3.24964205638050  
H 3.84441608471743 -0.94179056646082 2.88183112110505  
H 2.73447293998373 1.15062818547951 2.12237372664536  
H 2.7275508996386 0.76931723033291 0.38738916721542  
C 0.06730166925754 1.25888283820256 2.42067286892676  
C -1.42409565945409 1.30864278585025 2.17073072335623  
C -3.30792966329616 1.71571841691343 3.16298061799160  
C -3.67568973617912 1.68094481407443 2.87851990087155  
C -4.11789311800224 1.31532381864241 1.61469891112090  
C -3.15829110069601 0.97756927239733 0.64176078954822  
N -1.83612738797408 0.91324079188668 0.94396940449166  
N -3.46537515926149 0.73991078877920 -0.69578770237770  
C -4.73706983622891 0.78652715617748 -1.30801082945792  
O -5.76082484645777 0.80774585263984 -0.6457086010021  
C -4.71768538812532 0.86079232666847 -2.85003906215430  
C -4.25162865461924 2.28300500869232 -3.24698724198062  
H -3.22062702835066 2.48803076816576 -2.92565716286432  
H -4.90675259240024 3.04992304531423 -2.81424629956406  
H -4.28574666622261 2.38652823137073 -4.33941117816461  
C -3.77376782373593 -0.19191809460904 -3.46390940502841  
H -3.86010821677056 -0.16095180377876 -4.55771411554180  
H -4.03798411897370 -1.20801770991016 -3.14123602074950  
H -2.71306371624623 -0.01424051686827 -3.23335411239247  
C -6.14884530277108 0.62512754360482 -3.35853560329884  
H -6.51055978068552 -0.37342933880192 -3.08394046112236  
H -6.16665277767382 0.71069230622214 -4.45257450115319  
H -6.84675357498765 1.35765778241122 -2.93933359722831  
H -2.65442882866775 0.72596903192700 -1.31141232218811  
H -5.16958930035707 1.30427477920103 1.34918784176985  
H -4.40228379713348 1.96277748961214 3.63970259931545  
H -1.93858832391207 2.03896313411430 4.13486344826663  
H 0.38665666901520 2.12417264292949 3.02512294544536  
H 0.31140773887570 0.35352551487658 2.99415760849592

Table S17. Cartesian coordinates (Å) for CSD Refcode YETNIU02

| Atom | X                 | Y                 | Z                 |
|------|-------------------|-------------------|-------------------|
| Cu   | -0.18039750050401 | -0.13204961883325 | -0.04565434142594 |
| O    | -1.01754425856161 | -1.45934779957418 | -1.15846013151590 |
| H    | -1.98019937179107 | -1.34238347723805 | -1.22403441317873 |
| N    | 0.82667709717894  | 1.19433645980383  | 1.15021755471634  |
| C    | 0.84503226240239  | 2.4856355948678   | 0.41944832939845  |
| C    | 1.15706118943619  | 2.27110572077288  | -1.04414665368548 |
| C    | 1.81399692187291  | 3.23589338491543  | -1.79445152915901 |
| C    | 2.02373694222846  | 2.97619940021459  | -3.15385302694097 |
| C    | 1.61254103055567  | 1.77481444612933  | -3.70659675569160 |
| C    | 0.98460946976076  | 0.81683033669450  | -2.87679552525241 |
| N    | 0.73787940662698  | 1.09305286853247  | -1.56620279662719 |
| N    | 0.59416546823460  | -0.43936767300677 | -3.30753716785857 |
| C    | 0.97365574955999  | -1.06020740713162 | -4.51571752976053 |
| O    | 1.60284282863812  | -0.46479906052659 | -5.37836600916641 |
| C    | 0.56285200227815  | -2.54217825619230 | -4.65686453964877 |
| C    | 1.20399078886466  | -3.36679172731550 | -3.51769779024209 |
| H    | 0.97053157726456  | -4.42984322813816 | -3.66389863310244 |
| H    | 0.82678054842203  | -3.07679950845264 | -2.52913036559602 |
| H    | 2.29706785896920  | -3.26085954200989 | -3.52032816405200 |
| C    | -0.97507250759493 | -2.67002138751418 | -4.61070652375000 |
| H    | -1.44586470215120 | -2.06925520257565 | -5.40021483085827 |
| H    | -1.38734718981917 | -2.36334491835558 | -3.64143607426155 |
| H    | -1.25667558699258 | -3.71880065116043 | -4.77456218300475 |
| C    | 1.07661851781841  | -3.05424288666839 | -6.01146094459052 |
| H    | 2.16742914128545  | -2.97380355731560 | -6.08307164313426 |
| H    | 0.64776412842697  | -2.48472998545741 | -6.84419701264497 |
| H    | 0.79676827388627  | -4.10912385289126 | -6.13053765508446 |
| H    | 0.03045934879943  | -0.97535197050938 | -2.61944331855771 |
| H    | 1.78095414440994  | 1.53171738825686  | -4.74983462831418 |
| H    | 2.51856172798626  | 3.71468673382614  | -3.78379603507235 |
| H    | 2.15182813973026  | 4.16225645270551  | -1.33305152515694 |
| H    | 1.56793108937441  | 3.18193287572421  | 0.87423111512859  |
| H    | -0.15404679309266 | 2.93122822823502  | 0.52212057892773  |
| C    | 2.18279875658642  | 0.61864233838658  | 1.33059237212021  |
| C    | 2.08730153725351  | -0.85623516401276 | 1.63745586407858  |

## References

---

- (1) McLachlan, G. J.; Do, K.-A.; Ambrose, C., Discriminant Analysis. In *Analyzing Microarray Gene Expression Data*, John Wiley & Sons, Inc., Hoboken, New Jersey: 2005; pp 185-220.
- (2) (a) Brown, I. D.; Altermatt, D. *Acta Cryst.* **1985**, *B41*, 244-247. (b) Liu, W.; Thorp, H. H. *Inorg. Chem.* **1993**, *32*, 4102-4105. (c) Shields, G. P.; Raithby, P. R.; Allen, F. H.; Motherwell, W. D. S. *Acta Cryst.* **2000**, *B56*, 455-465. (d) Mahapatra, S.; Halfen, J. A.; Wilkinson, E. C.; Pan, G.; Wang, X.; Young, V. G.; Cramer, C. J.; Que, L.; Tolman, W. B. *J. Am. Chem. Soc.* **1996**, *118*, 11555-11574.
- (3) Groom, C. R.; Bruno, I. J.; Lightfoot, M. P.; Ward, S. C. *Acta Cryst.* **2016**, *B72*, 171-179.
- (4) Fortman, G. C.; Slawin, A. M. Z.; Nolan, S. P. *Organometallics* **2010**, *29*, 3966-3972.
- (5) Harata, M.; Hasegawa, K.; Jitsukawa, K.; Masuda, H.; Einaga, H. *Bull. Chem. Soc. Jpn.* **1998**, *71*, 1031-1038.
- (6) Lee, S. C.; Holm, R. H. *J. Am. Chem. Soc.* **1993**, *115*, 11789-11798.
- (7) Jitsukawa, K.; Harata, M.; Ariei, H.; Sakurai, H.; Masuda, H. *Inorg. Chim. Acta* **2001**, *324*, 108-116.
- (8) Tubbs, K. J.; Fuller, A. L.; Bennett, B.; Arif, A. M.; Berreau, L. M. *Inorg. Chem.* **2003**, *42*, 4790-4791.
- (9) Berreau, L. M.; Mahapatra, S.; Halfen, J. A.; Young, V. G.; Tolman, W. B. *Inorg. Chem.* **1996**, *35*, 6339-6342.
- (10) Green, M. T. *J. Am. Chem. Soc.* **2006**, *128*, 1902-1906.
- (11) Cramer, C. J.; Tolman, W. B. *Acc. Chem. Res.* **2007**, *40*, 601-608.
- (12) Hematian, S.; Garcia-Bosch, I.; Karlin, K. D. *Acc. Chem. Res.* **2015**, *48*, 2462-2474.
- (13) Mahadevan, V.; DuBois, J. L.; Hedman, B.; Hodgson, K. O.; Stack, T. D. P. *J. Am. Chem. Soc.* **1999**, *121*, 5583-5584.



- 
- (14) (a) Baldwin, M. J.; Ross, P. K.; Pate, J. E.; Tyeklar, Z.; Karlin, K. D.; Solomon, E. I. *J. Am. Chem. Soc.* **1991**, *113*, 8671-8679. (b) Jacobson, R. R.; Tyeklar, Z.; Farooq, A.; Karlin, K. D.; Liu, S.; Zubieta, J. *J. Am. Chem. Soc.* **1988**, *110*, 3690-3692.
- (15) Mizuno, M.; Honda, K.; Cho, J.; Furutachi, H.; Tosha, T.; Matsumoto, T.; Fujinami, S.; Kitagawa, T.; Suzuki, M. *Angew. Chem. Int. Ed.* **2006**, *45*, 6911-6914.
- (16) Mahadevan, V.; Hou, Z.; Cole, A. P.; Root, D. E.; Lal, T. K.; Solomon, E. I.; Stack, T. D. P. *J. Am. Chem. Soc.* **1997**, *119*, 11996-11997.
- (17) Mahapatra, S.; Young, V. G.; Kaderli, S.; Zuberbühler, A. D.; Tolman, W. B. *Angew. Chem. Int. Ed.* **1997**, *36*, 130-133.
- (18) Mahapatra, S.; Halfen, J. A.; Wilkinson, E. C.; Pan, G.; Wang, X.; Young, V. G.; Cramer, C. J.; Que, L.; Tolman, W. B. *J. Am. Chem. Soc.* **1996**, *118*, 11555-11574.
- (19) Chen, P.; Root, D. E.; Campochiaro, C.; Fujisawa, K.; Solomon, E. I. *J. Am. Chem. Soc.* **2003**, *125*, 466-474.
- (20) Chen, P.; Fujisawa, K.; Solomon, E. I. *J. Am. Chem. Soc.* **2000**, *122*, 10177-10193.
- (21) Hayes, E. C.; Porter, T. R.; Barrows, C. J.; Kaminsky, W.; Mayer, J. M.; Stoll, S. *J. Am. Chem. Soc.* **2016**, *138*, 4132-4145.
- (22) Kerber, W. D.; Goldberg, D. P. *J. Inorg. Biochem.* **2006**, *100*, 838-857.
- (23) Cook, S. A.; Borovik, A. S. *Acc. Chem. Res.* **2015**, *48*, 2407-2414.
- (24) Collins, T. J.; Powell, R. D.; Slebodnick, C.; Uffelman, E. S. *J. Am. Chem. Soc.* **1990**, *112*, 899-901.
- (25) England, J.; Prakash, J.; Cranswick, M. A.; Mandal, D.; Guo, Y.; Münck, E.; Shaik, S.; Que, L. *Inorg. Chem.* **2015**, *54*, 7828-7839.
- (26) Costas, M.; Rohde, J.-U.; Stubna, A.; Ho, R. Y. N.; Quaroni, L.; Münck, E.; Que, L. *J. Am. Chem. Soc.* **2001**, *123*, 12931-12932.
- (27) Xue, G.; Wang, D.; De Hont, R.; Fiedler, A. T.; Shan, X.; Münck, E.; Que, L. *Proc. Natl. Acad. Sci. USA* **2007**, *104*, 20713-20718.

- 
- (28) Thibon, A.; England, J.; Martinho, M.; Young, V. G.; Frisch, J. R.; Guillot, R.; Girerd, J. J.; Münck, E.; Que, L.; Banse, F. *Angew. Chem. Int. Ed.* **2008**, *47*, 7064-7067.
- (29) Sanders-Loehr, J.; Wheeler, W. D.; Shiemke, A. K.; Averill, B. A.; Loehr, T. M. *J. Am. Chem. Soc.* **1989**, *111*, 8084-8093.
- (30) (a) Betley, T. A.; Peters, J. C. *J. Am. Chem. Soc.* **2004**, *126*, 6252-6254. (b) Rohde, J.-U.; Betley, T. A.; Jackson, T. A.; Saouma, C. T.; Peters, J. C.; Que, L. *Inorg. Chem.* **2007**, *46*, 5720-5726.
- (31) Vogel, C.; Heinemann, F. W.; Sutter, J.; Anthon, C.; Meyer, K. *Angew. Chem., Int. Ed.* **2008**, *47*, 2681-2684.
- (32) Jüstel, T.; Müller, M.; Weyhermüller, T.; Kressl, C.; Bill, E.; Hildebrandt, P.; Lengen, M.; Grodzicki, M.; Trautwein, A. X.; Nuber, B.; Wieghardt, K. *Chem.—Eur. J.* **1999**, *5*, 793-810.
- (33) Buchler, J. W.; Dreher, C.; Lay, K. L.; Lee, Y. J.; Scheidt, W. R. *Inorg. Chem.* **1983**, *22*, 888-891.
- (34) Weckhuysen, B. M.; Wachs, I. E. *J. Chem. Soc., Faraday Trans.* **1996**, *92*, 1969-1973.
- (35) Holland, P. L. *Dalton Trans.* **2010**, *39*, 5415-5425.
- (36) Brown, E. C.; Bar-Nahum, I.; York, J. T.; Aboeella, N. W.; Tolman, W. B. *Inorg. Chem.* **2007**, *46*, 486-496.
- (37) Kincaid, J. R.; Zheng, Y.; Al-Mustafa, J.; Czarnecki, K. *J. Biol. Chem.* **1996**, *271*, 28805-28811.
- (38) Green, M. T.; Dawson, J. H.; Gray, H. B. *Science* **2004**, *304*, 1653-1656.
- (39) Sitter, A. J.; Reczek, C. M.; Turner, J. *J. Biol. Chem.* **1985**, *260*, 7515-22.
- (40) Stone, K. L.; Behan, R. K.; Green, M. T. *Proc. Natl. Acad. Sci. USA* **2005**, *102*, 16563-16565.
- (41) Egawa, T.; Miki, H.; Ogura, T.; Makino, R.; Ishimura, Y.; Kitagawa, T. *FEBS Lett.* **1992**, *305*, 206-208.

- 
- (42) Stone, K. L.; Behan, R. K.; Green, M. T. *Proc. Natl. Acad. Sci. USA* **2006**, *103*, 12307-12310.
- (43) Proshlyakov, D. A.; Henshaw, T. F.; Monterosso, G. R.; Ryle, M. J.; Hausinger, R. P. *J. Am. Chem. Soc.* **2004**, *126*, 1022-1023.
- (44) Riggs-Gelasco, P. J.; Price, J. C.; Guyer, R. B.; Brehm, J. H.; Barr, E. W.; Bollinger, J. M.; Krebs, C. *J. Am. Chem. Soc.* **2004**, *126*, 8108-8109.
- (45) Yosca, T. H.; Behan, R. K.; Krest, C. M.; Onderko, E. L.; Langston, M. C.; Green, M. T. *J. Am. Chem. Soc.* **2014**, *136*, 9124-9131.
- (46) Banerjee, R.; Proshlyakov, Y.; Lipscomb, J. D.; Proshlyakov, D. A. *Nature* **2015**, *518*, 431-434.
- (47) Shu, L.; Nesheim, J. C.; Kauffmann, K.; Münck, E.; Lipscomb, J. D.; Que, L. *Science* **1997**, *275*, 515-518.
- (48) Magnus, K. A.; Hazes, B.; Ton-That, H.; Bonaventura, C.; Bonaventura, J.; Hol, W. G. J. *Proteins: Struct., Funct., Bioinf.* **1994**, *19*, 302-309.
- (49) Loehr, J. S.; Freedman, T. B.; Loehr, T. M. *Biochem. Biophys. Res. Commun.* **1974**, *56*, 510-515.
- (50) (a) Huber, K. P.; Herzberg, G., *Molecular Spectra and Molecular Structure: IV. Constants of Diatomic Molecules*. Springer US: Boston, MA, 1979. (b) Jules, J. L.; Lombardi, J. R. *J. Phys. Chem. A* **2003**, *107*, 1268-1273. (c) Baudhuin, M. A. A Study of Gas Phase Heterobimetallic and Organometallic Complexes by Anion Photoelectron Spectroscopy. Ph.D. Dissertation, University of Minnesota, Twin Cities, 2016.
